# Supplementary material
Source: Springer Nature journal article supplement (https://www.springermedizin.de/resource/supplementary/13012_2009_270_MOESM2_ESM.pdf/9629602)
Supplement: MOESM2 [file 9629602]

## Review Question

What methods were used for rapid review?

Are there any comparisons of rapid versus traditional methods?

What are the implications of taking methodological short-cuts from a traditional Cochrane review?

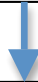

### Search

*Database search:*

1,893 articles identified

*Grey Matters Tool:*

67 articles identified

*Expert consultation:*

4 articles identified

*Hand search of reference lists:*

9 articles identified

**Total reviewed after checking for duplication:**

1,989 articles

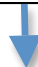

### Title and Abstract Screening

189 articles remained

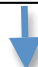

### Full Text Relevance Screening

70 articles remained

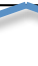

25 examples selected

45 methods articles:  
2 surveys  
26 analyses  
17 commentaries
